# Supplementary material for: Cancer-related effects on relationships, long-term psychological status and relationship satisfaction in couples whose child was treated for leukemia: A PETALE study
Source: PLoS One. 2018 Sep 7;13(9):e0203435. doi: 10.1371/journal.pone.0203435 (PMC6128557; doi:10.1371/journal.pone.0203435)
Supplement: S2 File — (PDF) [file pone.0203435.s003.pdf]

## IMPACT OF CANCER ON THE COUPLE

(Peloquin & Sultan, 2013)

1. How old were you at the beginning of your relationship with the father/mother of your child cancer survivor ? \_\_\_\_\_
2. How long have you been a couple (or how for how long were you a couple) with the father/mother of your child cancer survivor ? \_\_\_\_\_
3. What is your current marital status ?
  1. \_\_\_\_ In a relationship with the father/mother of my child cancer survivor (go directly to question 5)
  2. \_\_\_\_ In a relationship with another partner (answer question 4)
  3. \_\_\_\_ Single (separated/divorced) (answer question 4)
  4. \_\_\_\_ Widowed (go directly to question 5)
4. If you are separated/divorced from the father/mother of your child cancer survivor, in your opinion how much did your child's illness contributed to this separation ?
  1. \_\_\_\_ The illness (and the context surrounding the illness) is *not at all related* to our separation.
  2. \_\_\_\_ The illness (and the context surrounding the illness) *contributed slightly* to our separation.
  3. \_\_\_\_ The illness (and the context surrounding the illness) *moderately contributed* to our separation.
  4. \_\_\_\_ The illness (and the context surrounding the illness) *greatly contributed* to our separation.
  5. \_\_\_\_ The illness (and the context surrounding the illness) is *entirely responsible* for our separation
5. Were you in a relationship with the father / mother of your child cancer survivor at the time that your child was sick and followed for treatment at Sainte-Justine?
  1. \_\_\_\_ Yes, we were a couple (answer question 6)
  0. \_\_\_\_ No, we were separated (do not answer questions 6 and 7)

**The following questions deal with the period in which your child was sick and followed for treatment. Please answer these questions, thinking back to your relationship during this period.**

6. When couples experience severe stress, including a child's illness, these situations may influence their relationship in a variety of ways. Using the following response scales, please rate the extent to which your child's illness had an effect on the following relationship dimensions:

**6.A.1 Intimacy between you and your partner:**

| <i>1</i>                    | <i>2</i>                          | <i>3</i>                        | <i>4</i>         | <i>5</i>                        | <i>6</i>                          | <i>7</i>                    |
|-----------------------------|-----------------------------------|---------------------------------|------------------|---------------------------------|-----------------------------------|-----------------------------|
| <i>Very negative effect</i> | <i>Moderately negative effect</i> | <i>Slightly negative effect</i> | <i>No effect</i> | <i>Slightly positive effect</i> | <i>Moderately positive effect</i> | <i>Very positive effect</i> |

**6.A.2.** If you answered 1, 2 or 3, did these negative effects persist when your child's treatments were completed?

1. ☐ The negative effects disappeared immediately
2. ☐ The negative effects have persisted, but have faded with time
3. ☐ The negative effects were permanent

**6.B.1. The quality of support between you and your partner:**

| <i>1</i>                    | <i>2</i>                          | <i>3</i>                        | <i>4</i>         | <i>5</i>                        | <i>6</i>                          | <i>7</i>                    |
|-----------------------------|-----------------------------------|---------------------------------|------------------|---------------------------------|-----------------------------------|-----------------------------|
| <i>Very negative effect</i> | <i>Moderately negative effect</i> | <i>Slightly negative effect</i> | <i>No effect</i> | <i>Slightly positive effect</i> | <i>Moderately positive effect</i> | <i>Very positive effect</i> |

**6.B.2.** If you answered 1, 2 or 3, did these negative effects persist when your child's treatments were completed?

1. ☐ The negative effects disappeared immediately
2. ☐ The negative effects have persisted, but have faded with time
3. ☐ The negative effects were permanent

**6.C.1. Sexuality between you and your partner:**

| <i>1</i>                    | <i>2</i>                          | <i>3</i>                        | <i>4</i>         | <i>5</i>                        | <i>6</i>                          | <i>7</i>                    |
|-----------------------------|-----------------------------------|---------------------------------|------------------|---------------------------------|-----------------------------------|-----------------------------|
| <i>Very negative effect</i> | <i>Moderately negative effect</i> | <i>Slightly negative effect</i> | <i>No effect</i> | <i>Slightly positive effect</i> | <i>Moderately positive effect</i> | <i>Very positive effect</i> |

**6.C.2.** If you answered 1, 2 or 3, did these negative effects persist when your child's treatments were completed?

1. ☐ The negative effects disappeared immediately
2. ☐ The negative effects have persisted, but have faded with time
3. ☐ The negative effects were permanent

**6.D.1. Conflicts between you and your partner:**

| <i>1</i>                    | <i>2</i>                          | <i>3</i>                        | <i>4</i>         | <i>5</i>                        | <i>6</i>                          | <i>7</i>                    |
|-----------------------------|-----------------------------------|---------------------------------|------------------|---------------------------------|-----------------------------------|-----------------------------|
| <i>Very negative effect</i> | <i>Moderately negative effect</i> | <i>Slightly negative effect</i> | <i>No effect</i> | <i>Slightly positive effect</i> | <i>Moderately positive effect</i> | <i>Very positive effect</i> |

**6.D.2.** If you answered 1, 2 or 3, did these negative effects persist when your child's treatments were completed?

1. ☐ The negative effects disappeared immediately
2. ☐ The negative effects have persisted, but have faded with time
3. ☐ The negative effects were permanent

**6.E.1. Time spent and activities done with your partner:**

| 1                           | 2                                 | 3                               | 4                | 5                               | 6                                 | 7                           |
|-----------------------------|-----------------------------------|---------------------------------|------------------|---------------------------------|-----------------------------------|-----------------------------|
| <i>Very negative effect</i> | <i>Moderately negative effect</i> | <i>Slightly negative effect</i> | <i>No effect</i> | <i>Slightly positive effect</i> | <i>Moderately positive effect</i> | <i>Very positive effect</i> |

**6.E.2.** If you answered 1, 2 or 3, did these negative effects persist when your child's treatments were completed?

1. ☐ The negative effects disappeared immediately
2. ☐ The negative effects have persisted, but have faded with time
3. ☐ The negative effects were permanent

**6.F.1. Your overall relationship satisfaction:**

| 1                           | 2                                 | 3                               | 4                | 5                               | 6                                 | 7                           |
|-----------------------------|-----------------------------------|---------------------------------|------------------|---------------------------------|-----------------------------------|-----------------------------|
| <i>Very negative effect</i> | <i>Moderately negative effect</i> | <i>Slightly negative effect</i> | <i>No effect</i> | <i>Slightly positive effect</i> | <i>Moderately positive effect</i> | <i>Very positive effect</i> |

**6.F.2.** If you answered 1, 2 or 3, did these negative effects persist when your child's treatments were completed?

1. ☐ The negative effects disappeared immediately
2. ☐ The negative effects have persisted, but have faded with time
3. ☐ The negative effects were permanent

**7. In general, how would you describe the impact of the period in which your child was sick on your couples' relationship?**

| 1                                                                              | 2 | 3 | 4                                                    | 5 | 6 | 7                                                                        |
|--------------------------------------------------------------------------------|---|---|------------------------------------------------------|---|---|--------------------------------------------------------------------------|
| <i>This period has distanced us / has been detrimental to our relationship</i> |   |   | <i>This period had no effect on our relationship</i> |   |   | <i>This period has brought us closer / strengthened our relationship</i> |
