# Supplementary material for: Cancer-related effects on relationships, long-term psychological status and relationship satisfaction in couples whose child was treated for leukemia: A PETALE study
Source: PLOS journal article supplement (doi:10.1371/journal.pone.0203435), 2018-09-07
Supplement: S5 (10.1371/journal.pone.0203435.s005) [file journal.pone.0203435.s005]

**S2 Table.** Proportion of parents that reported negative change, no change and positive change in relationship dimensions on the Impact of Cancer on the Couple ( $n = 103$ ).

| Table 1. Proportion of parents that reported negative change, no change and positive change in relationship dimension on the impact of Cancer on the Couple (N = 105). |                                 |                     |               |                     |                     |               |                     |                        |
|------------------------------------------------------------------------------------------------------------------------------------------------------------------------|---------------------------------|---------------------|---------------|---------------------|---------------------|---------------|---------------------|------------------------|
| Relationship Dimensions                                                                                                                                                | Mothers                         |                     |               | Couples             |                     | Fathers       |                     |                        |
|                                                                                                                                                                        | Nature of changes               |                     |               | Nature of changes   |                     |               |                     |                        |
|                                                                                                                                                                        | Duration of the negative change | Negative change (%) | No change (%) | Positive change (%) | Negative change (%) | No change (%) | Positive change (%) | Wilcoxon tests         |
| <b>Intimacy</b>                                                                                                                                                        |                                 | 65.0                | 9.7           | 25.2                | 43.7                | 21.4          | 35.0                | $z = -2.861, p = .004$ |
| Disappeared immediately (%)                                                                                                                                            |                                 | 31.3                |               |                     | 33.3                |               |                     |                        |
| Faded with time (%)                                                                                                                                                    |                                 | 62.7                |               |                     | 64.4                |               |                     |                        |
| Permanent (%)                                                                                                                                                          |                                 | 6.0                 |               |                     | 2.2                 |               |                     |                        |
| <b>Quality of partner support</b>                                                                                                                                      |                                 | 7.8                 | 10.7          | 81.6                | 3.9                 | 13.6          | 82.5                | $z = -.932, p = .351$  |
| Disappeared immediately (%)                                                                                                                                            |                                 | 25.0                |               |                     | 50.0                |               |                     |                        |
| Faded with time (%)                                                                                                                                                    |                                 | 62.5                |               |                     | 25.0                |               |                     |                        |
| Permanent (%)                                                                                                                                                          |                                 | 12.5                |               |                     | 25.0                |               |                     |                        |
| <b>Sexuality</b>                                                                                                                                                       |                                 | 68.0                | 19.4          | 12.6                | 57.3                | 32.0          | 10.7                | $z = -1.110, p = .267$ |
| Disappeared immediately (%)                                                                                                                                            |                                 | 32.9                |               |                     | 39.0                |               |                     |                        |
| Faded with time (%)                                                                                                                                                    |                                 | 58.6                |               |                     | 44.1                |               |                     |                        |
| Permanent (%)                                                                                                                                                          |                                 | 8.6                 |               |                     | 16.9                |               |                     |                        |
| <b>Conflict</b>                                                                                                                                                        |                                 | 32.0                | 45.6          | 22.3                | 26.2                | 52.4          | 21.4                | $z = -.642, p = .521$  |
| Disappeared immediately (%)                                                                                                                                            |                                 | 33.3                |               |                     | 59.3                |               |                     |                        |
| Faded with time (%)                                                                                                                                                    |                                 | 60.1                |               |                     | 33.3                |               |                     |                        |
| Permanent (%)                                                                                                                                                          |                                 | 6.1                 |               |                     | 7.4                 |               |                     |                        |
| <b>Time &amp; activities</b>                                                                                                                                           |                                 | 55.3                | 21.4          | 23.3                | 48.5                | 27.2          | 24.3                | $z = -.683, p = .495$  |
| Disappeared immediately (%)                                                                                                                                            |                                 | 39.3                |               |                     | 54.0                |               |                     |                        |
| Faded with time (%)                                                                                                                                                    |                                 | 55.4                |               |                     | 44.0                |               |                     |                        |
| Permanent (%)                                                                                                                                                          |                                 | 5.4                 |               |                     | 2.0                 |               |                     |                        |
| <b>Relationship satisfaction</b>                                                                                                                                       |                                 | 30.1                | 17.5          | 52.4                | 22.3                | 25.2          | 52.4                | $z = -1.091, p = .275$ |
| Disappeared immediately (%)                                                                                                                                            |                                 | 22.6                |               |                     | 30.4                |               |                     |                        |
| Faded with time (%)                                                                                                                                                    |                                 | 71.0                |               |                     | 56.5                |               |                     |                        |
| Permanent (%)                                                                                                                                                          |                                 | 6.5                 |               |                     | 13.0                |               |                     |                        |
| <b>Overall impact of illness on relationship</b>                                                                                                                       |                                 | 19.4                | 7.8           | 72.8                | 12.6                | 13.6          | 73.8                | $z = -1.263, p = .207$ |

*Note.* Relationship dimensions are represented on a 1 - 7 scale. Classifications of scores are as follows: Scores 1 - 3 = negative effect, 4 = no effect, and 5 - 7 = positive effect. Bolded text indicates a significant gender difference.
